# Supplementary material for: The ubiquitin ligase NEDD4-2/NEDD4L regulates both sodium homeostasis and fibrotic signaling to prevent end-stage renal disease
Source: PubMed Central journal article supplement (PMC8046789; doi:10.1038/s41419-021-03688-7), 2021-04-14
Supplement: 41419_2021_3688_MOESM1_ESM.pdf [file 41419_2021_3688_MOESM1_ESM.pdf]

## Supplementary Information

**This file contains the following Supplementary Information:**

Supplementary Fig. 1. Weight change over experimental diet duration

Supplementary Fig. 2. Kidney injury in *Nedd4-2<sup>Ksp1.3</sup>* mice

Supplementary Fig. 3. Signaling pathways in *Nedd4-2<sup>Ksp1.3</sup>* mice

Supplementary Fig. 4. Generation of NEDD4-2 KO cells

Supplementary Figure 1

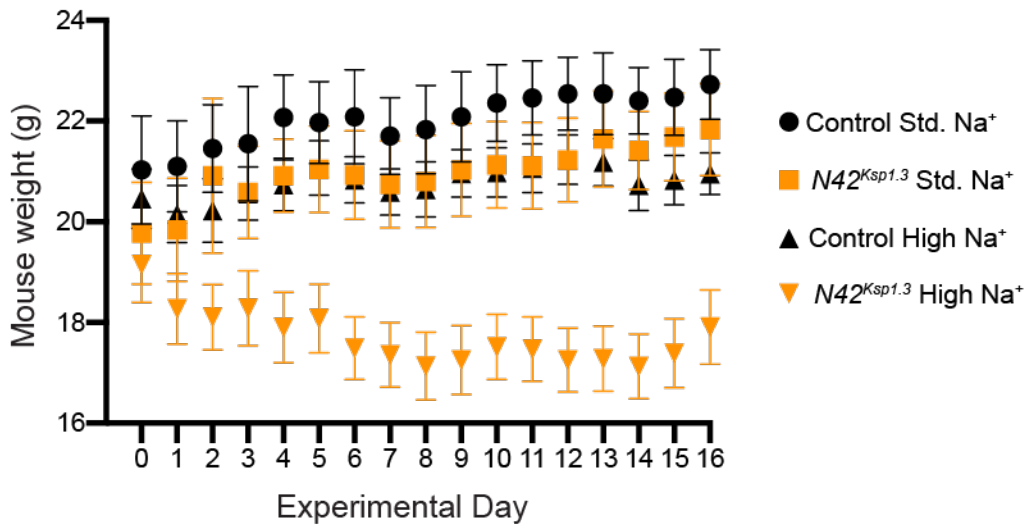

**Supplementary Fig. 1. Weight change over experimental diet duration**

Daily mouse weight on standard (Std.) or high Na<sup>+</sup> diet, n=7-11. Data presented as means ± SEM.

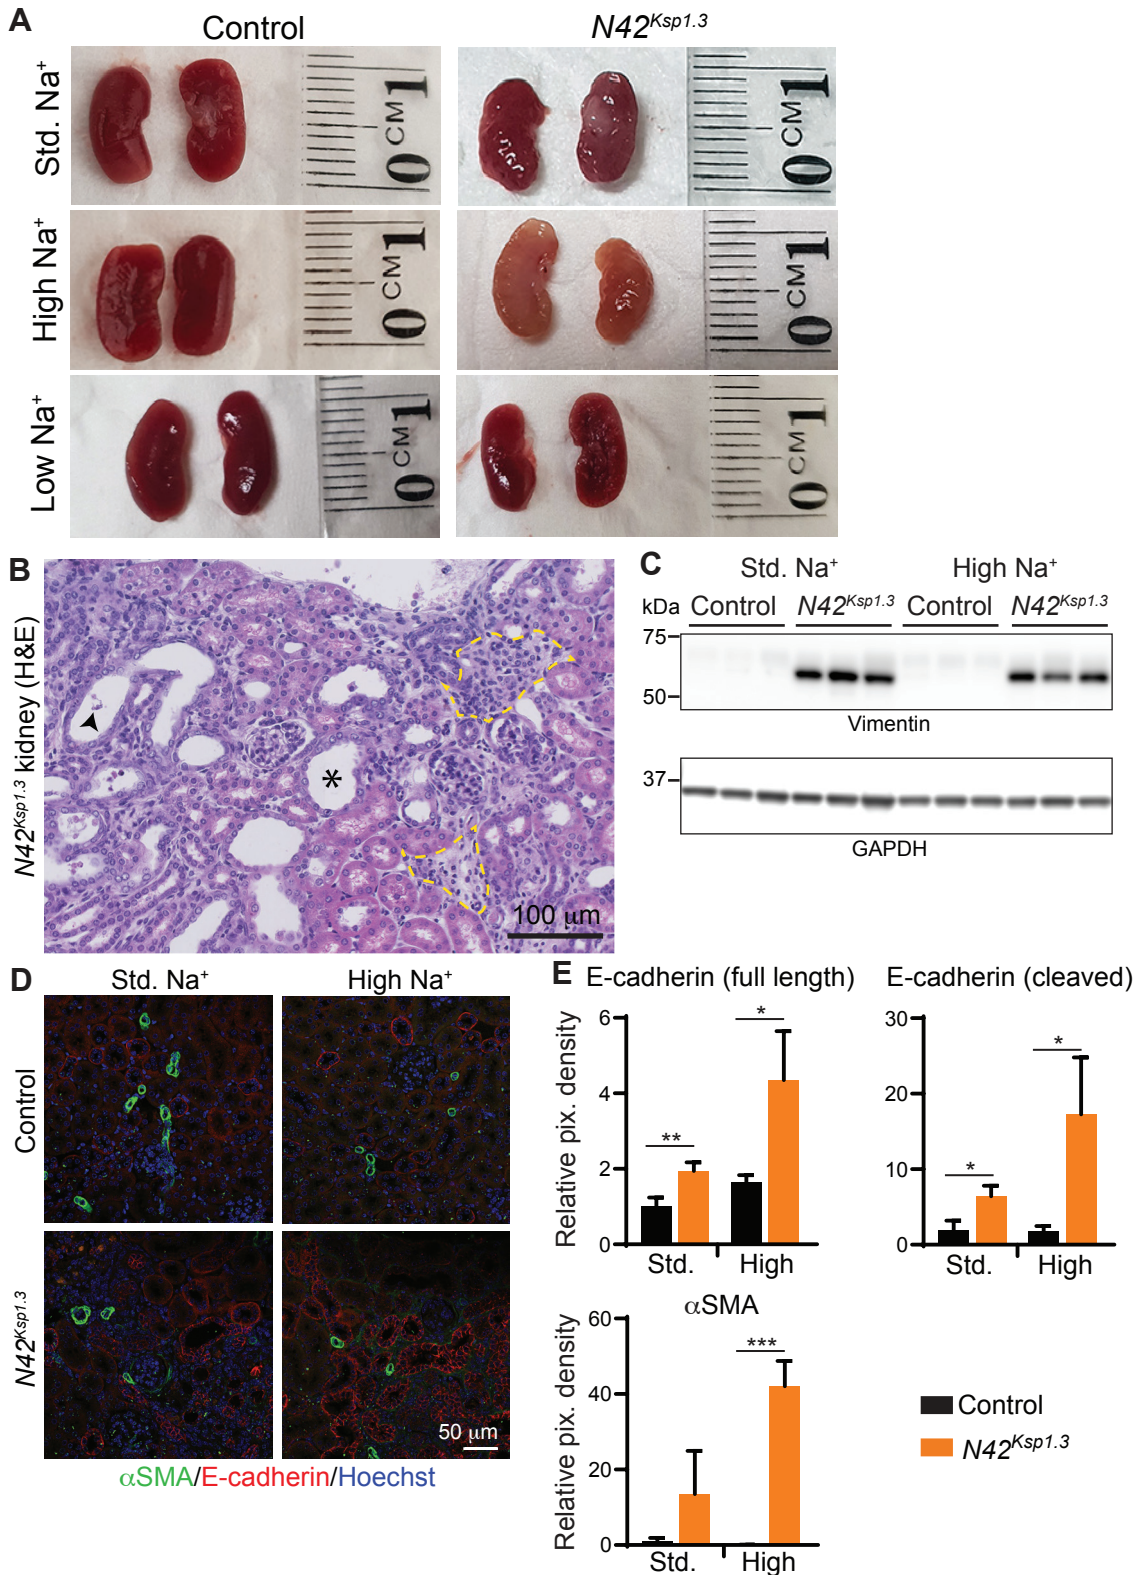

**Supplementary Fig. 2. Kidney injury in *Nedd4-2<sup>Ksp1.3</sup>* mice**

**A** Gross morphology of kidneys from mice fed standard (Std.), high or low Na<sup>+</sup> diets. **B** A representative example of Hematoxylin and Eosin staining of *Nedd4-2<sup>Ksp1.3</sup>* kidney after high Na<sup>+</sup> diet. As examples, \* indicates dilated tubule, dotted line shows areas of mesenchymal infiltration and arrowhead points to cell debris. Scale bar, 100  $\mu$ m. **C** Immunoblot analysis of Vimentin with GAPDH as loading control. **D** Lower magnification images from Fig. 3E. **E** Quantitation of immunoblots from Fig. 3F normalized to GAPDH loading control, n=3. Data presented as means  $\pm$  SD with significance determined using unpaired 2-tailed Student's t-test. \**P* < 0.05, \*\**P* < 0.01, \*\*\**P* < 0.005.

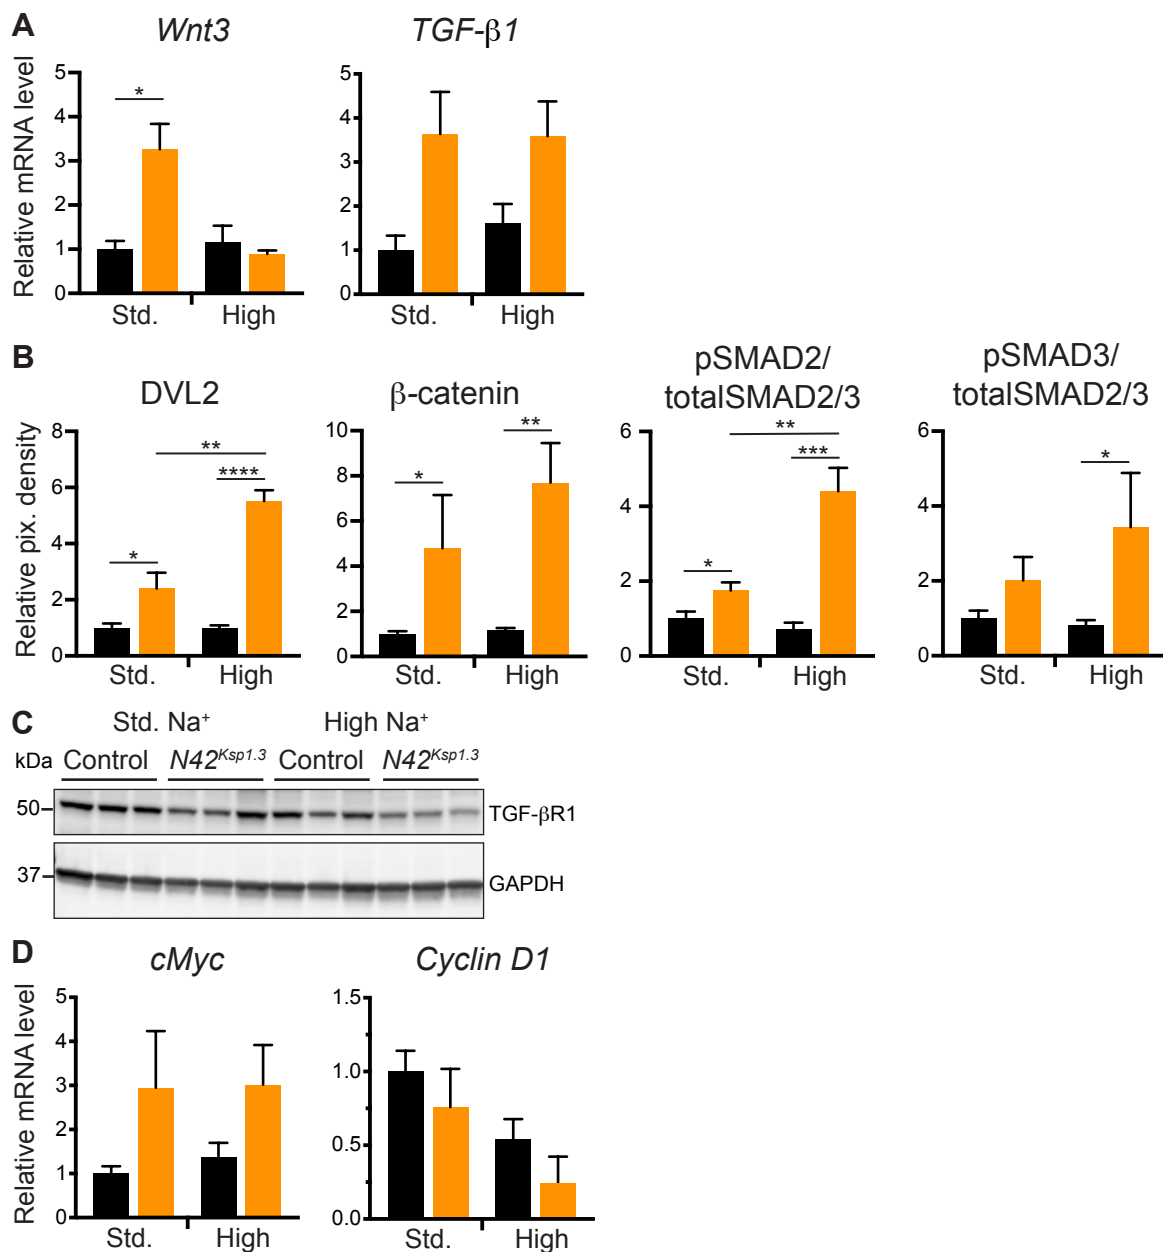

**Supplementary Fig. 3. Signaling pathways in *Nedd4-2<sup>Ksp1.3</sup>* mice**

**A** qRT-PCR analysis of *Wnt3* and *TGF-β1* relative to TBP. **B** Quantitation of immunoblots from Fig. 4C normalized to GAPDH loading control, n=3. **C** Immunoblot analysis of TGF-βR1 with GAPDH as loading control. **D** qRT-PCR analysis of *cMyc* and *Cyclin D1* relative to TBP. Data presented as means ± SEM (**A**, **D**) or means ± SD (**B**) with significance determined using unpaired 2-tailed Student's t-test, n = 3-4. \**P* < 0.05, \*\**P* < 0.01, \*\*\**P* < 0.005, \*\*\*\**P* < 0.001.

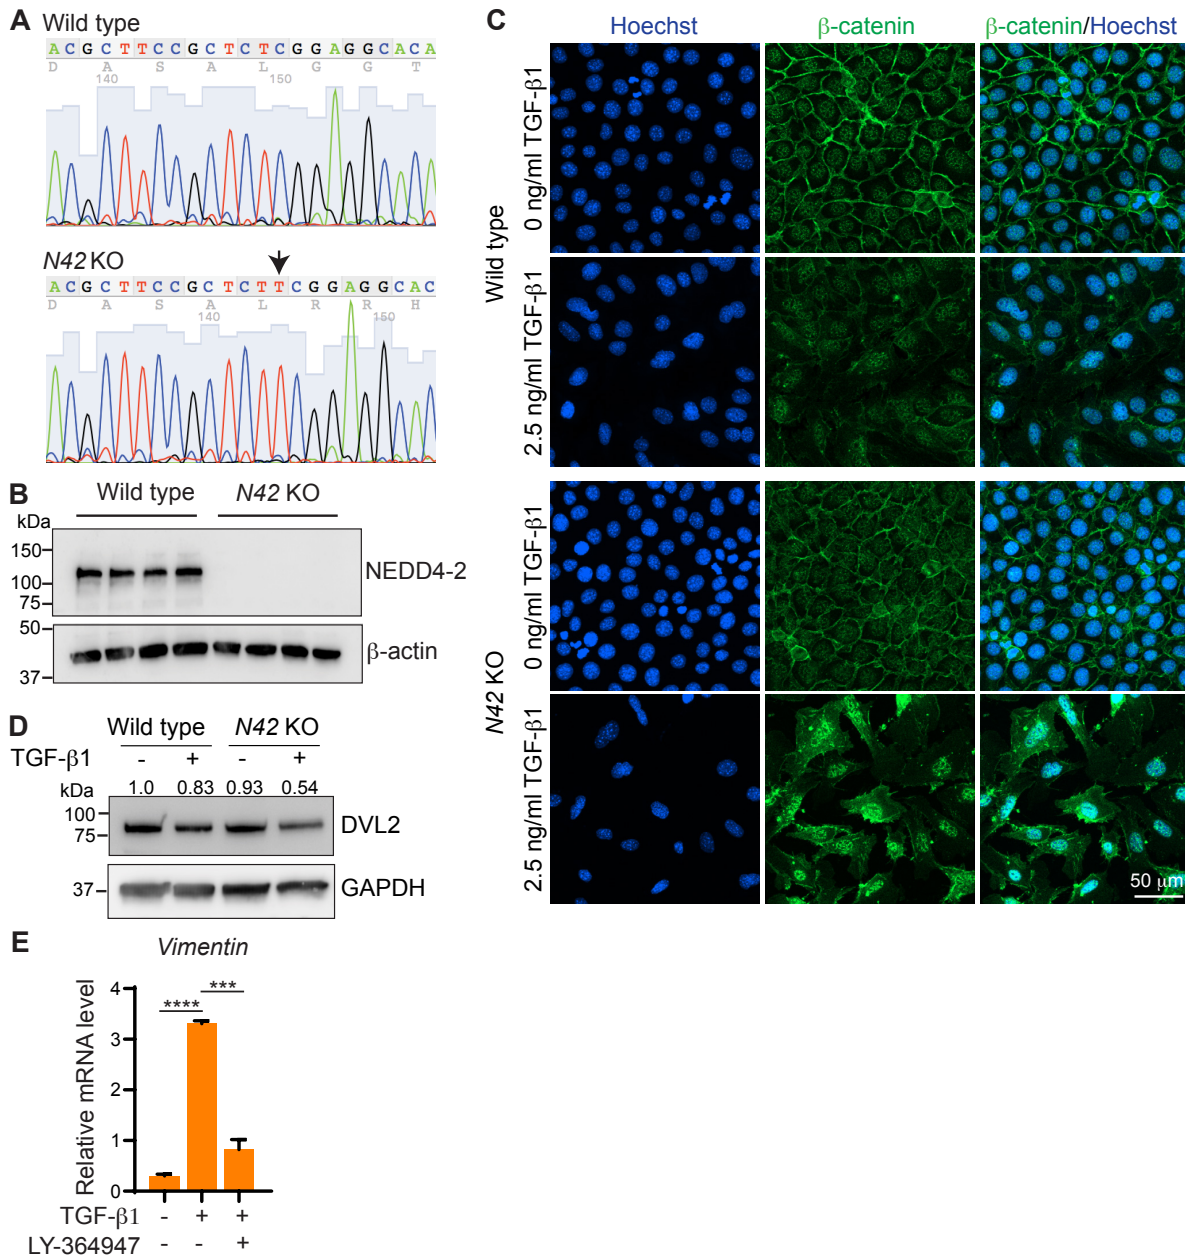

#### Supplementary Fig. 4. Generation of NEDD4-2 KO cells

**A** An example of sequencing of a *Nedd4-2* (N42) KO clone, showing insertion of a single amino acid. **B** Immunoblot of 4 independent wild type and *Nedd4-2* KO clonal cell lines with β-actin as loading control. **C** Lower magnification and single color panels together with merged images for Fig. 5E of β-catenin and Hoechst staining of 72 h TGF-β1 treated CCD cells. **C** Immunoblot analysis of DVL2 with GAPDH as loading control. Numbers indicate quantitation of DVL2 bands relative to untreated wild type lane, normalized to GAPDH. **E** qRT-PCR analysis of *Vimentin* relative to *TBP* after treatment with TGF-β1 and LY-363947 inhibitor. Data presented as means ± SEM with significance determined using unpaired 2-tailed Student's t-test, n = 4. \*\*\**P* < 0.005, \*\*\*\**P* < 0.001.
